# Supplementary material for: An intrinsic self-healable supramolecular dynamic covalent elastomer for sustainable high-performance tactile sensing
Source: Royal Society of Chemistry journal article supplement (doi:10.1039/d5sc01404b), 2025-01-01
Supplement: d5sc01404b1.pdf [file d5sc01404b1.pdf]

## *Supplementary Information*

### **An intrinsic self-healable supramolecular dynamic covalent elastomer for sustainable high-performance tactile sensing**

*Ding Yang, Jiahui Zhao, Fang-Yu Liu, Meng Chen\* and Da-Hui Qu\**

Key Laboratory for Advanced Materials and Joint International Research Laboratory of Precision Chemistry and Molecular Engineering, Feringa Nobel Prize Scientist Joint Research Center, Frontiers Science Center for Materiobiology and Dynamic Chemistry, Institute of Fine Chemicals, School of Chemistry and Molecular Engineering, East China University of Science and Technology, 130 Meilong Road, Shanghai, 200237 (China).

\*Corresponding author: [ac0105@ecust.edu.cn](mailto:ac0105@ecust.edu.cn), [dahui\\_qu@ecust.edu.cn](mailto:dahui_qu@ecust.edu.cn)

## Table of Contents

|                                                                                                                                                                        |    |
|------------------------------------------------------------------------------------------------------------------------------------------------------------------------|----|
| Experimental .....                                                                                                                                                     | 4  |
| <b>Section I. Monomer spectrum assignment</b> .....                                                                                                                    | 7  |
| <b>Figure S1.</b> Graphic presentation of monomeric precursor compound SPG.....                                                                                        | 7  |
| <b>Figure S2.</b> $^1\text{H}$ NMR spectrum of <b>SPG</b> monomer. (400 MHz, $\text{CDCl}_3$ , 298 K) .....                                                            | 7  |
| <b>Figure S3.</b> $^{13}\text{C}$ NMR spectrum of <b>SPG</b> monomer. (600 MHz, $\text{CDCl}_3$ , 298 K) .....                                                         | 8  |
| <b>Figure S4.</b> Mass spectrum of <b>SPG</b> monomer. ....                                                                                                            | 8  |
| <b>Section II. Supporting Figures</b> .....                                                                                                                            | 9  |
| <b>Figure S5.</b> Raman spectra of <b>TA-SPG</b> polymers. ....                                                                                                        | 9  |
| <b>Figure S6.</b> X-ray diffraction (XRD) of <b>TA-SPG</b> polymers.....                                                                                               | 9  |
| <b>Figure S7.</b> Synchrotron-radiation small-angle X-ray scattering (SAXS) of <b>TA-SPG</b><br>polymers. ....                                                         | 9  |
| <b>Figure S8.</b> Wide-angle X-ray scattering (WAXS) of <b>TA-SPG</b> polymers. ....                                                                                   | 10 |
| <b>Figure S9.</b> Thermogravimetry analysis (TGA) of <b>TA-SPG</b> polymers. ....                                                                                      | 10 |
| <b>Figure S10.</b> The tensile stress-strain curves with different rates of <b>TA-SPG</b> <sub>10-0.1%</sub> . ....                                                    | 11 |
| <b>Figure S11.</b> Swelling experiments of <b>TA-SPG</b> <sub>10-0.1%</sub> polymer. photos of <b>TA-SPG</b> <sub>10-0.1%</sub><br>polymers in different solvents..... | 11 |
| <b>Figure S12.</b> The attenuated total reflection Fourier-transform infrared (ATR-FTIR)<br>spectra of polymers. ....                                                  | 12 |
| <b>Figure S13.</b> The attenuated total reflection Fourier-transform infrared (ATR-FTIR)<br>spectra of polymers. ....                                                  | 12 |
| <b>Figure S14.</b> Two-Dimensional Correlation Spectroscopy (2D-COS). ....                                                                                             | 13 |
| <b>Figure S15.</b> The self-healing progress of <b>TA-SPG</b> <sub>10-0.1%</sub> under different ambient<br>humidity conditions by optical microscopy. ....            | 13 |
| <b>Figure S16.</b> The tensile testing of <b>TA-SPG</b> <sub>10-0.1%</sub> after self-healing under different<br>ambient humidity conditions.....                      | 14 |
| <b>Figure S17.</b> $^1\text{H}$ NMR spectrum of <b>TA-SPG</b> <sub>10-0.1%</sub> ( <b>recycling cycle 1</b> ). (400 MHz, $\text{CDCl}_3$ ,<br>298 K)      14           |    |
| <b>Figure S18.</b> $^{13}\text{C}$ NMR spectrum of <b>TA-SPG</b> <sub>10-0.1%</sub> ( <b>recycling cycle 1</b> ). (600 MHz,<br>$\text{CDCl}_3$ , 298 K).....           | 15 |
| <b>Figure S19.</b> $^1\text{H}$ NMR spectrum of <b>TA-SPG</b> <sub>10-0.1%</sub> ( <b>recycling cycle 2</b> ). (400 MHz, $\text{CDCl}_3$ ,<br>298 K)      15           |    |
| <b>Figure S20.</b> $^1\text{H}$ NMR spectrum of <b>TA-SPG</b> <sub>10-0.1%</sub> ( <b>recycling cycle 3</b> ). (400 MHz, $\text{CDCl}_3$ ,<br>298 K)      16           |    |

|                                                                                                                                                  |    |
|--------------------------------------------------------------------------------------------------------------------------------------------------|----|
| <b>Figure S21.</b> Mass spectrum of SPG mono in <b>TA-SPG<sub>10-0.1%</sub></b> ( <b>recycling cycle 1</b> ). .....                              | 16 |
| <b>Figure S22.</b> Mass spectrum of TA mono in <b>TA-SPG<sub>10-0.1%</sub></b> ( <b>recycling cycle 1</b> ). .....                               | 17 |
| <b>Figure S23.</b> Mass spectrum of caffeic acid in <b>TA-SPG<sub>10-0.1%</sub></b> ( <b>recycling cycle 1</b> ). .....                          | 17 |
| <b>Figure S24.</b> The sensor sensitivity comparisons of dielectric layer with and without pyramid microstructure. ....                          | 18 |
| <b>Section III. Supporting Tables</b> .....                                                                                                      | 19 |
| <b>Table S1.</b> The summary of the tensile strength and elongation-at-break of all polymer. 19                                                  |    |
| <b>Table S2.</b> Summarises tensile strength and elongation-at-break with different tensile rates of <b>TA-SPG<sub>10-0.1%</sub></b> . ....      | 19 |
| <b>Table S3.</b> Self-healing mechanical properties of TA-SPG polymers.....                                                                      | 19 |
| <b>Table S4.</b> Self-healing mechanical properties of <b>TA-SPG<sub>10-0.1%</sub></b> polymers under different ambient humidity conditions..... | 20 |
| <b>Table S5.</b> Multiple recycling cycles mechanical properties of <b>TA-SPG<sub>10-0.1%</sub></b> polymers. ....                               | 20 |
| <b>Table S7.</b> GPC data including Mn, Mw, and PDI of recycled <b>TA-SPG<sub>10-0.1%</sub></b> .....                                            | 20 |
| <b>Table S8.</b> Signs of the main cross-peaks in 2DCOS. ....                                                                                    | 21 |

## **Experimental**

### ***Monomer fabrication***

All chemicals were obtained from Sigma-Aldrich and MACKLIN, China, and used as received without further purification. TA (1.1 eq, 1.0 g, 4.85 mmol) and SPG (1.0 eq, 3.0 g, 4.4 mmol) were dissolved in DCM (100 mL). DMAP (0.11 eq, 0.059 g, 0.49 mmol) and EDCI (1.1 eq, 0.95 g, 4.85 mmol) were added to the DCM solution. The mixture was stirred at room temperature for 12 h. The product was purified by column chromatography (silica gel, PE/EA = 1) to afford compound SPG (yield = 86%) as a yellow solid.

### ***Polymer fabrication***

High power LED lamp source (Beijing Perfectlight: PLS- LED100C) (365 nm) with 50 W power was utilised to obtain photo-polymerised polymers.

The polymers were fabricated as: 0.48 g of SPG and 2 g of TA powder were combined and heated at 120°C. The liquid mixture was exposed to ultraviolet light (365 nm) for 12 hours for a yellow transparent solid. The preparation process for the other copolymers used in subsequent tests followed the same method as described above.

### ***Structure characterisations***

Chemicals were weighed on analytical balances (METTLER- TOLEDO, ME204T/02). Nuclear magnetic resonance (NMR) spectrum was tested by Brüker AV-400 (<sup>1</sup>H NMR) and AV-600 (<sup>13</sup>C NMR) spectrometer using tetramethylsilane to be the internal standard. The electronic spray ionisation (ESI) mass spectra were tested on an LCT Premier XE mass spectrometer. The Raman spectra were recorded using a Laser Micro-Raman Spectrometer (Renishaw, I0.2/cm/invia reflex) equipped with a high-performance grade Leica DMLM microscope and a 785 nm excitation wavelength. X-ray diffraction (XRD) patterns were obtained on a rotating anode X-ray powder diffractometer (18KW/D/max2550VB/PC) equipped with a copper target 18KW (450 mA), a fully automated curved (plate) crystal graphite monochromator and a programmed variable slit system. Fourier transform infrared spectrometer (FT-IR) (Thermo Nicolet Corporation; 7800- 350/cm 0.01/cm/6700) was used to analyse the copolymer samples.

### ***Thermal properties tests***

The thermal stability was measured by thermogravimetric analysis (Mettler Toledo TGA/SDTA851, heating rate =  $5^{\circ}\text{C min}^{-1}$ ). The thermal properties were measured by differential scanning calorimetry (TA instruments; modulated DSC2910, 1090B, ramp rate =  $5^{\circ}\text{C min}^{-1}$ ).

### ***Mechanical properties tests***

The mechanical properties of the polymer films were measured by an HY-0580 tension machine (HENGYI). The rheological experiments were performed by rotational rheometer (TA Instruments- Waters LLC; DHR-2). All stress-strain curves were obtained from a HY-0580 tension machine (HENGYI Company). The rectangular test samples ( $30 \times 5 \times 0.5$  mm) were fixed on the jigs of the tension machine, with the initial length (10 mm) considered as the gap between the two edges of the jigs. Unless otherwise noted, the tensile stress was measured at a constant speed of  $20 \text{ mm min}^{-1}$ .

### ***Self-healing experiment***

The self-healing experiment was done as follows: the rectangle-shaped tested sample (length, 30 mm; width, 10 mm) was cut off into two identical pieces by a knife from the middle. Then the interfaces of the two pieces were contacted immediately followed by slight extrusion. The reassembled sample was placed for different hours before a test at room temperature. The testing procedure was the same as above. The polarised optical microscopy images were obtained on typical optical microscopy equipped with two polarisers. Different humidity test was conducted as follows: the 0% RH condition was to put freshly prepared polymer samples in a desiccator for three consecutive days prior to tensile test, representing winter-like conditions; the 50% RH condition was established by exposing the samples to ambient laboratory air for three days, corresponding to typical spring or fall conditions; the 70% RH condition, simulating summer conditions, was realized using a custom-designed humidity-controlled chamber.

### ***Recycled tests***

The virgin polymer chips (1 g) were chopped, added into chloroform with the presence of Triflic acid TfOH (0.03 g). The mixture was heated to  $70^{\circ}\text{C}$  for 8 hours until a clear transparent yellow even solution was obtained, washed with water ( $10 \text{ ml} \times 5$ ), saturated sodium chloride (10 ml

$\times 2$ ), then concentrated. A bright yellow recycled monomeric solid was obtained, then subjected to polymer fabrication as described above.

### ***Sensor tests***

The relative capacitance changes in the elastomers with pressure were recorded by digital source meter TH2830 LCR Test System 2.2.12D@170522. The relative capacitance change was calculated according to the following equations:  $\Delta C/C_0 = (C - C_0)/C_0$ ,  $S = (\Delta C/C_0)/P$ , where  $C$  is the real-time capacitance of the stretched elastomer at a certain state and  $C_0$  is the original capacitance. The  $S$  was calculated to assess the sensing sensitivity of the elastomer, and  $P$  is the pressure imposed on the elastomer. All experiments were performed in accordance with the Guidelines of the Measures for Ethical Review of Life Science and Medical Research Involving Human Beings Article 32, and approved by the ethics committee at The East China University of Science and Technology. Informed consents were obtained from human participants of this study.

## Section I. Monomer spectrum assignment

### Monomer SPG

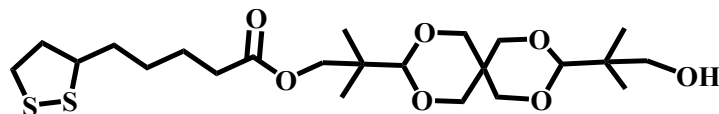

**Figure S1.** Graphic presentation of monomeric precursor compound SPG.

$^1\text{H}$  NMR (400 MHz, Chloroform-*d*, 298 K)  $\delta$  (ppm): 4.50 (ddd,  $J = 11.5, 6.3, 2.6$  Hz, 1H), 4.24 (d,  $J = 6.2$  Hz, 1H), 3.91 (s, 1H), 3.63 – 3.05 (m, 6H), 2.50 – 2.26 (m, 1H), 1.97 – 1.38 (m, 3H), 1.25 (d,  $J = 12.5$  Hz, 0H), 0.98 – 0.86 (m, 6H).

$^{13}\text{C}$  NMR (151 MHz, Chloroform-*d*, 298 K)  $\delta$  (ppm): 108.10, 105.02, 78.63 – 75.87 (m), 71.23 – 68.73 (m), 56.40, 40.65 – 37.98 (m), 34.15, 32.65 (d,  $J = 11.1$  Hz), 28.82, 24.77, 20.58 – 18.78 (m).

HR-MS (ESI) ( $m/z$ ):  $[\text{M} + \text{H}]^+$  calcd. For  $\text{C}_{23}\text{H}_{41}\text{NaO}_7\text{S}_2$ , 493.2294, found 493.2288, (680.2545 or  $m/z$  680.9890).

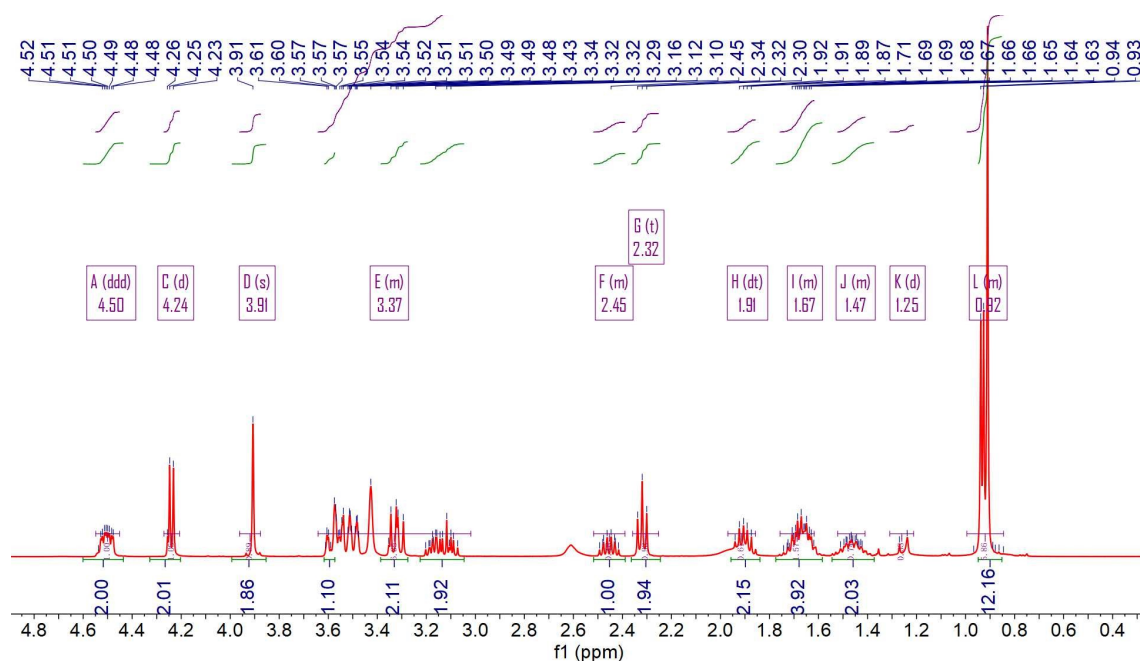

**Figure S2.**  $^1\text{H}$  NMR spectrum of SPG monomer. (400 MHz,  $\text{CDCl}_3$ , 298 K)

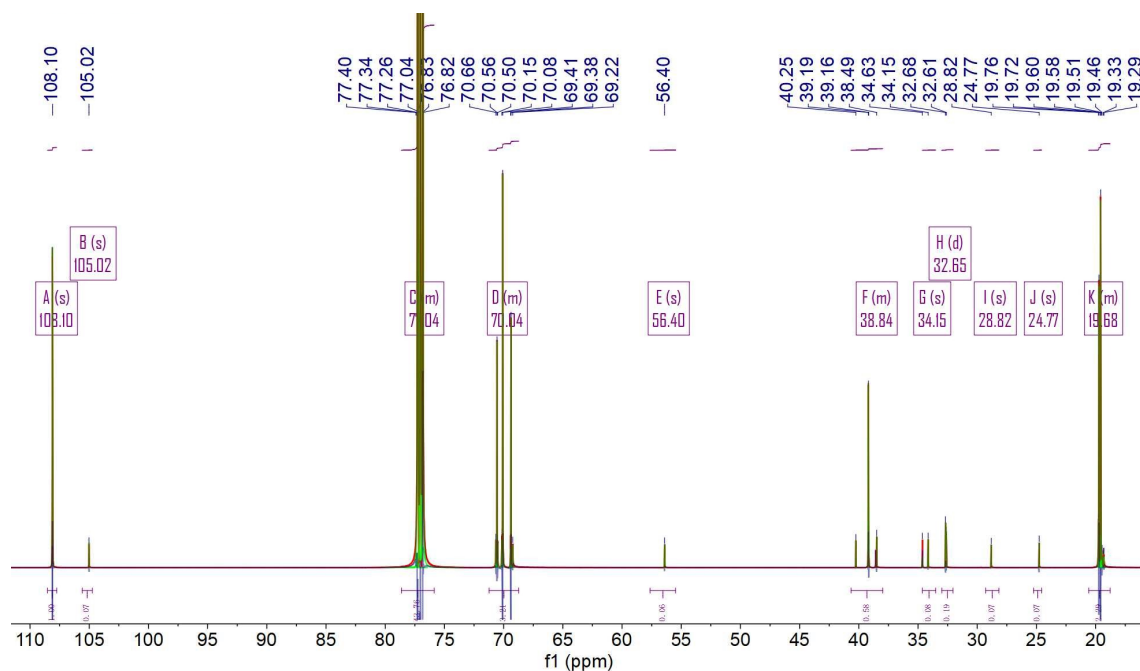

**Figure S3.**  $^{13}\text{C}$  NMR spectrum of **SPG** monomer. (600 MHz,  $\text{CDCl}_3$ , 298 K)

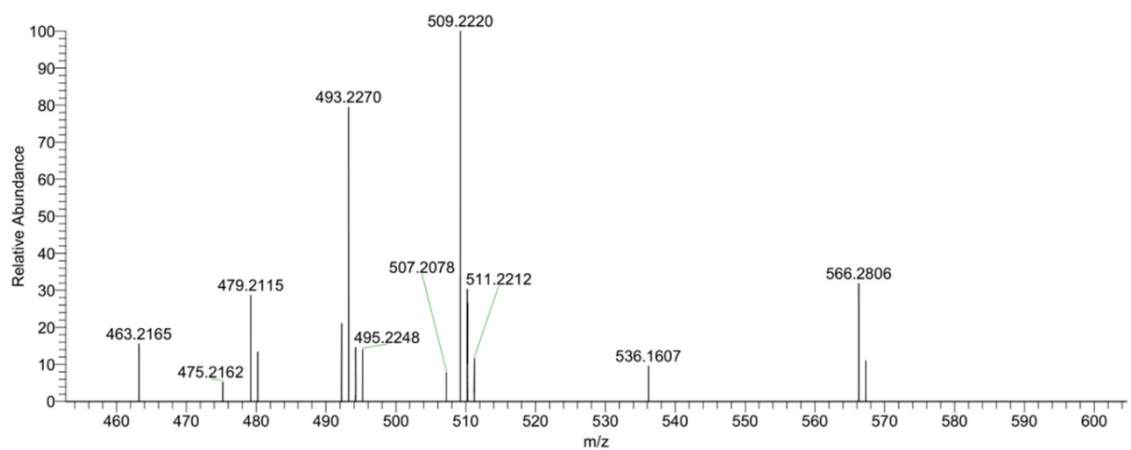

QD-YD-1#81 RT: 0.19

T: FTMS + p NSI Full ms [100.0000-1500.0000]

m/z= 493.14-493.35

| m/z      | Intensity | Relative | Theo. Mass | Delta (ppm) | Composition                                      |
|----------|-----------|----------|------------|-------------|--------------------------------------------------|
| 493.2270 | 38120.9   | 100.00   | 493.2288   | -1.80       | $\text{C}_{23}\text{H}_{41}\text{O}_7\text{S}_2$ |

**Figure S4.** Mass spectrum of **SPG** monomer.



## Section II. Supporting Figures

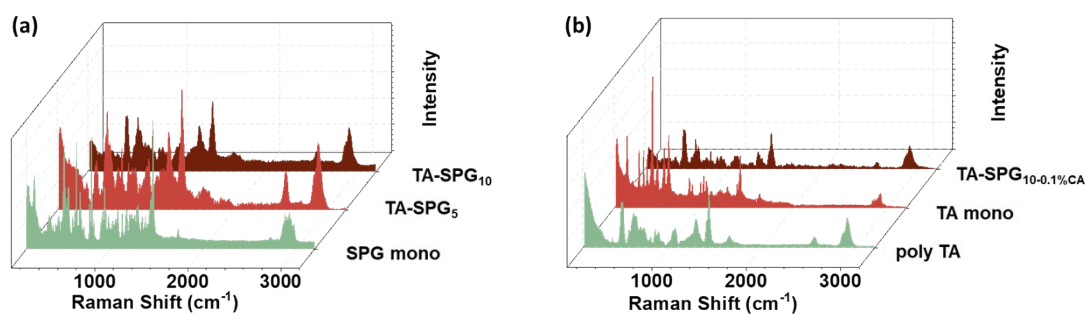

**Figure S5.** Raman spectra of TA-SPG polymers.

(a) SPG mono, TA-SPG<sub>5</sub>, and TA-SPG<sub>10</sub>. (b) poly TA, TA mono, and TA-SPG<sub>10-0.1%CA</sub>.

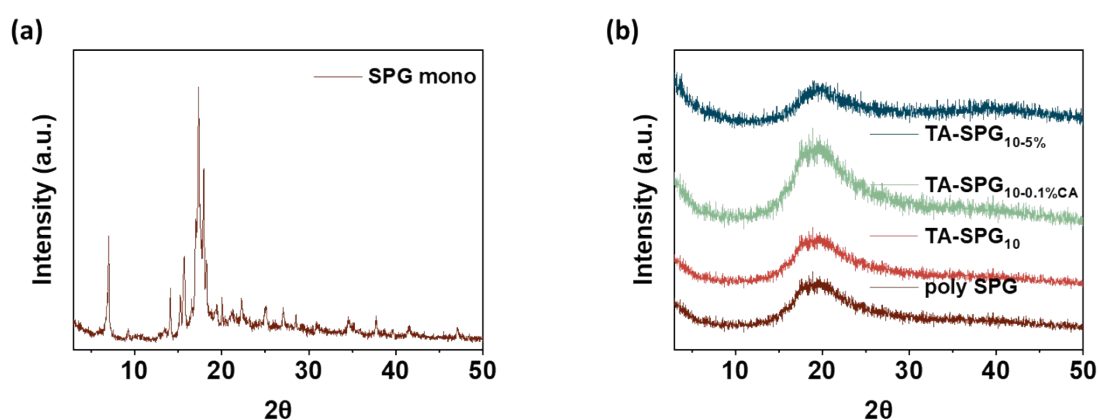

**Figure S6.** X-ray diffraction (XRD) of TA-SPG polymers.

(a) SPG mono. (b) TA-SPG<sub>10-5%</sub>, TA-SPG<sub>10-0.1%CA</sub>, TA-SPG<sub>10</sub>, and poly SPG.

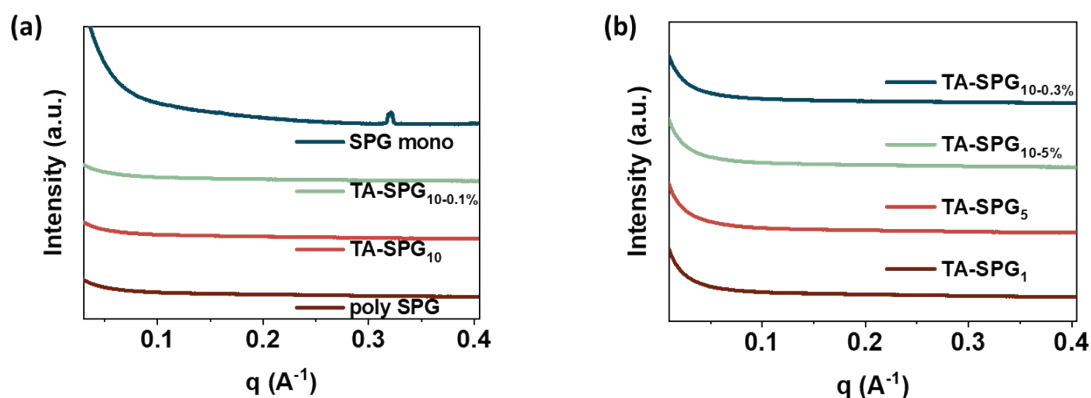

**Figure S7.** Synchrotron-radiation small-angle X-ray scattering (SAXS) of TA-SPG polymers.

(a) poly SPG, TA-SPG<sub>10</sub>, TA-SPG<sub>10-0.1%</sub>, SPG mono. (b) TA-SPG<sub>1</sub>, TA-SPG<sub>5</sub>, TA-SPG<sub>10-5%</sub>, TA-SPG<sub>10-0.3%</sub>. Synchrotron-radiation small-angle X-ray scattering (SAXS) measurements confirmed the amorphous network without notable microphase separation.

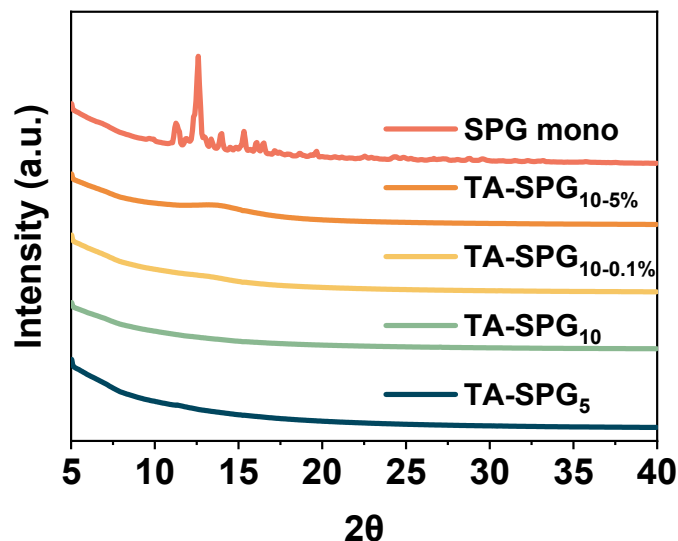

**Figure S8.** Wide-angle X-ray scattering (WAXS) of TA-SPG polymers.

**TA-SG<sub>5</sub>, TA-SG<sub>10</sub>, TA-SG<sub>10-0.1%</sub>, TA-SG<sub>10-5%</sub>, SPG mono.** Wide-angle X-ray scattering (WAXS) measurements confirmed the amorphous network without notable microphase separation.

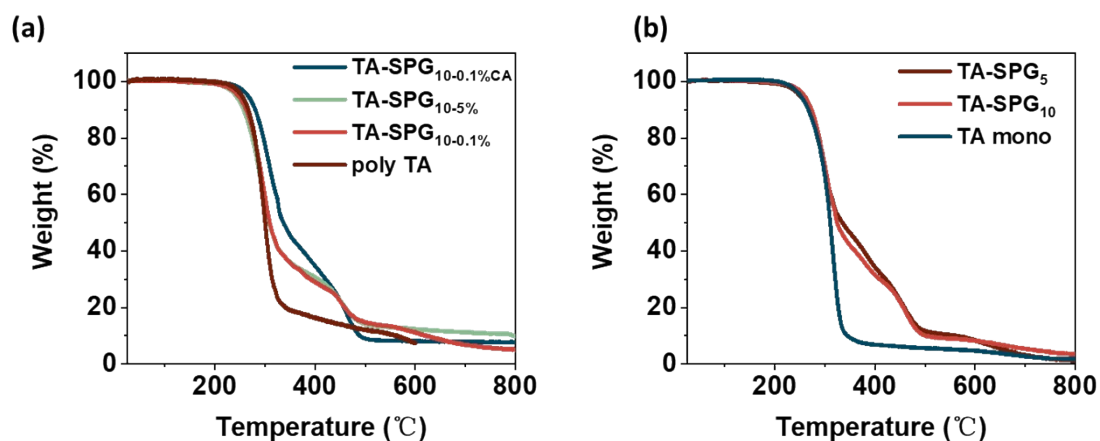

**Figure S9.** Thermogravimetry analysis (TGA) of TA-SPG polymers.

(a) **TA-SPG<sub>10-0.1%CA</sub>, TA-SPG<sub>10-5%</sub>, TA-SPG<sub>10-0.1%</sub>, poly TA.** (b) **TA-SPG<sub>5</sub>, TA-SPG<sub>10</sub>, TA mono.** Different scales polymers of TA and SG show an obvious enhancement at decomposition temperature from TGA data. There is little difference among the decomposition curves of different amounts of additives [CA: Fe].

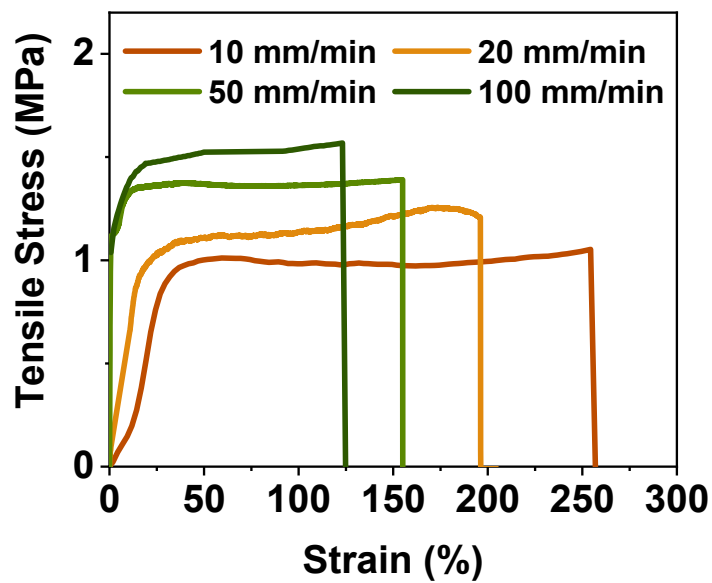

**Figure S10.** The tensile stress-strain curves with different rates of TA-SPG<sub>10-0.1%</sub>.

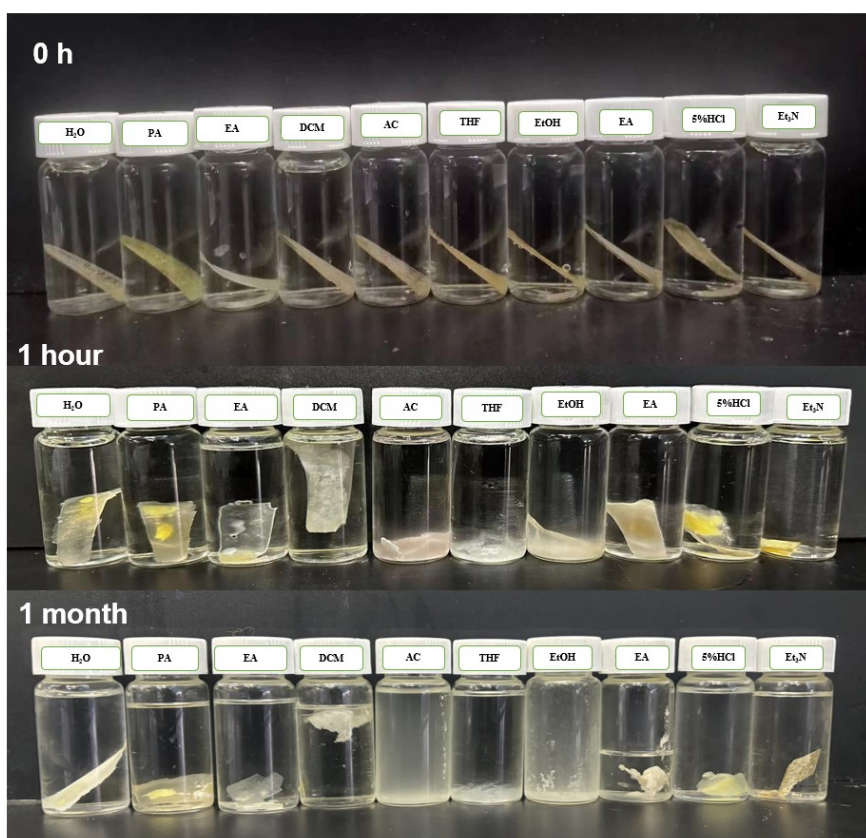

**Figure S11.** Swelling experiments of TA-SPG<sub>10-0.1%</sub> polymer. photos of TA-SPG<sub>10-0.1%</sub> polymers in different solvents.

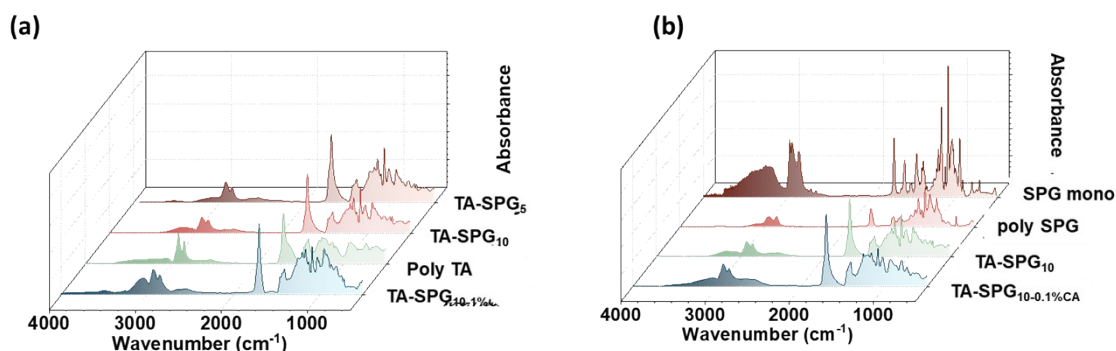

**Figure S12.** The attenuated total reflection Fourier-transform infrared (ATR-FTIR) spectra of polymers.

(a) The attenuated total reflection Fourier-transform infrared (ATR-FTIR) spectra of TA-SPG<sub>1</sub>, TA-SPG<sub>5</sub>, TA-SPG<sub>10-5%</sub>, TA-SPG<sub>10-0.1%CA</sub>. (b) The attenuated total reflection Fourier-transform infrared (ATR-FTIR) spectra of TA-SPG<sub>10-0.1%CA</sub>, TA-SPG<sub>10</sub>, poly SPG, SPG mono.

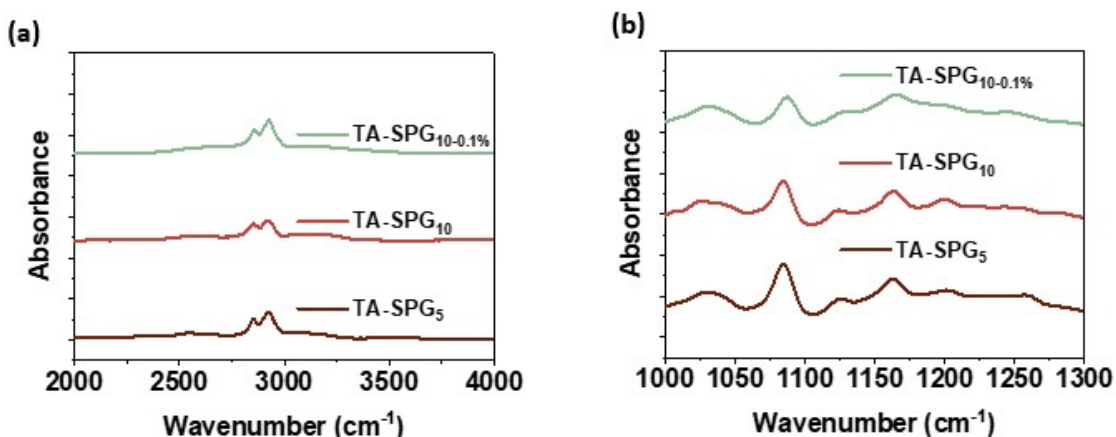

**Figure S13.** The attenuated total reflection Fourier-transform infrared (ATR-FTIR) spectra of polymers.

(a-b) (a) The attenuated total reflection Fourier-transform infrared (ATR-FTIR) spectra of TA-SPG<sub>5</sub>, TA-SPG<sub>10</sub>, TA-SPG<sub>10-0.1%</sub>, (a) from 2000 to 4000 cm<sup>-1</sup> and (b) from 1000 to 1300 cm<sup>-1</sup>.

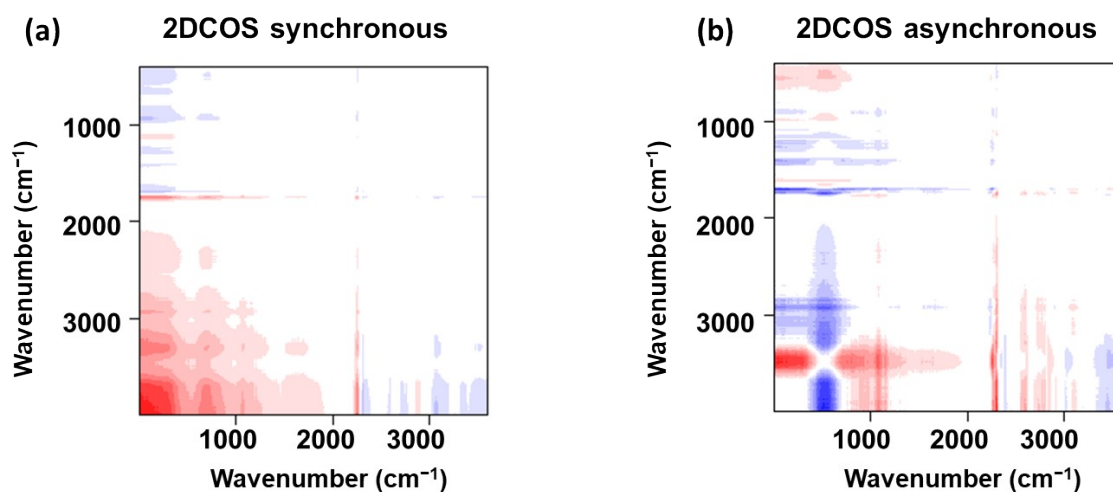

**Figure S14.** Two-Dimensional Correlation Spectroscopy (2D-COS).

(a) Two-Dimensional Correlation Spectroscopy (2D-COS) synchronous and (b) Two-Dimensional Correlation Spectroscopy (2D-COS) asynchronous spectra. The red color represents positive spectral intensities, while the blue color represents negative ones.

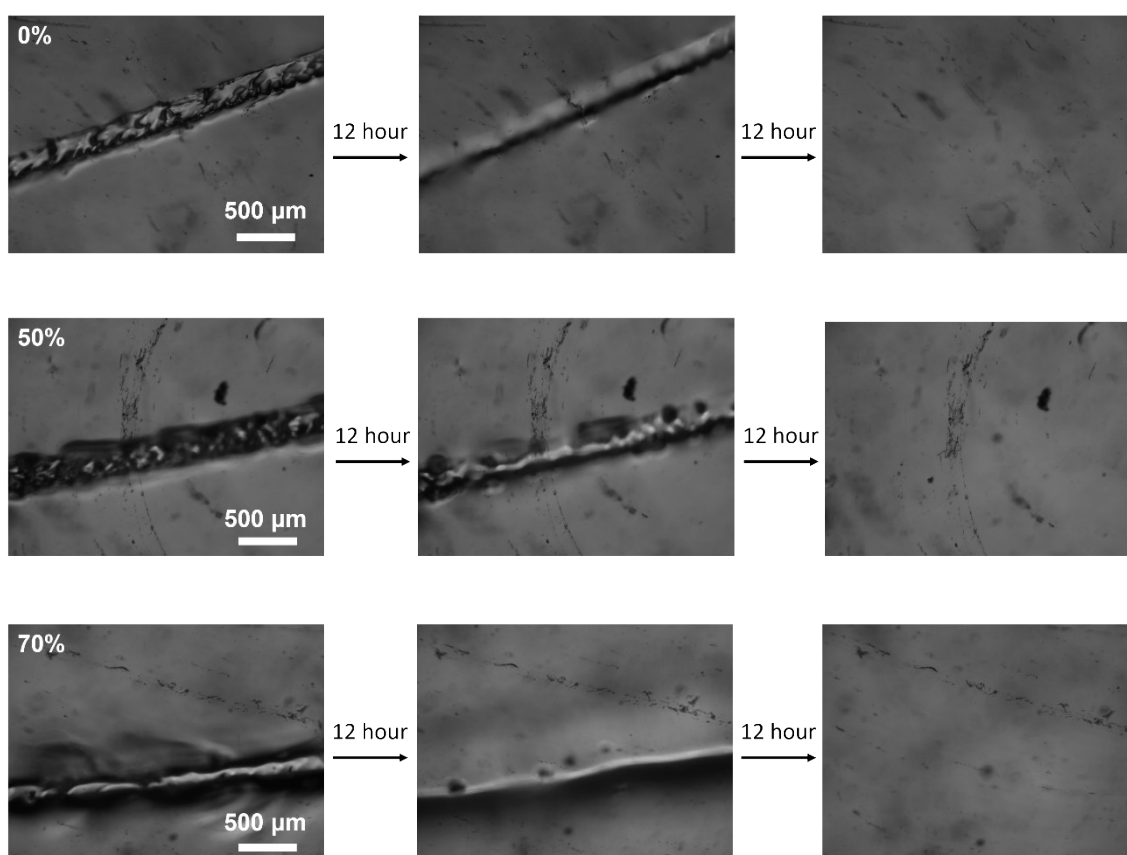

**Figure S15.** The self-healing progress of TA-SPG<sub>10-0.1%</sub> under different ambient humidity conditions by optical microscopy.

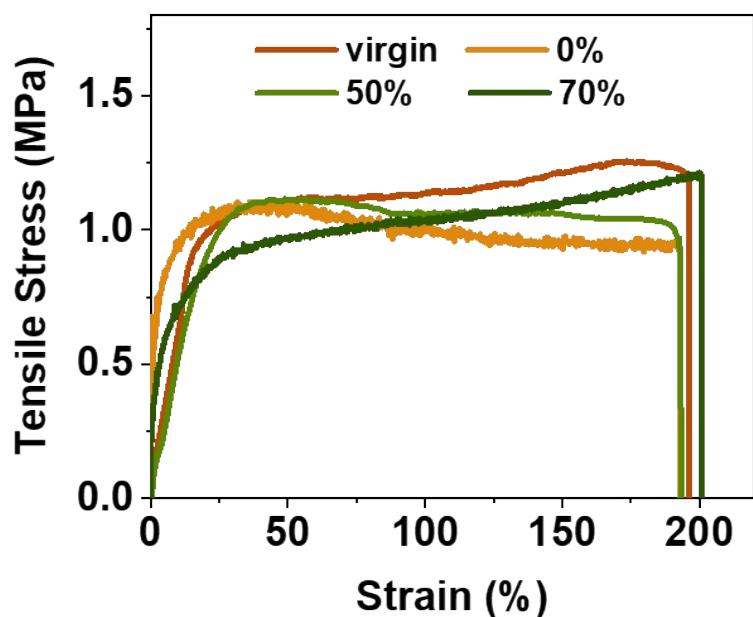

**Figure S16.** The tensile testing of TA-SPG<sub>10-0.1%</sub> after self-healing under different ambient humidity conditions.

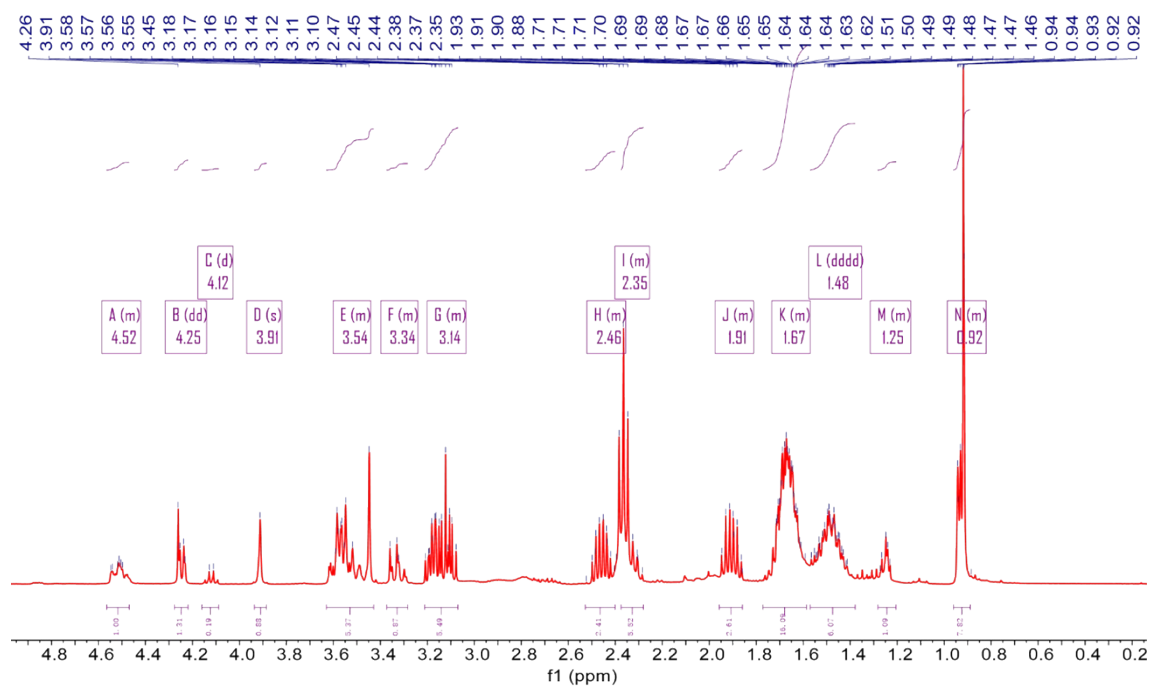

**Figure S17.** <sup>1</sup>H NMR spectrum of TA-SPG<sub>10-0.1%</sub> (recycling cycle 1). (400 MHz, CDCl<sub>3</sub>, 298 K)

<sup>1</sup>H NMR (400 MHz, Chloroform-*d*)  $\delta$  4.57 – 4.47 (m, 1H), 4.25 (dd,  $J$  = 9.1, 2.9 Hz, 1H), 4.12 (d,  $J$  = 7.2 Hz, 0H), 3.91 (s, 1H), 3.63 – 3.43 (m, 5H), 3.37 – 3.28 (m, 1H), 3.21 – 3.07 (m, 5H), 2.53 – 2.40 (m, 2H), 2.38 – 2.28 (m, 6H), 1.96 – 1.86 (m, 3H), 1.77 – 1.59 (m, 16H), 1.48 (dddd,  $J$  = 18.1, 13.3, 9.3, 7.0 Hz, 6H), 1.28 – 1.20 (m, 1H), 0.96 – 0.89 (m, 8H).

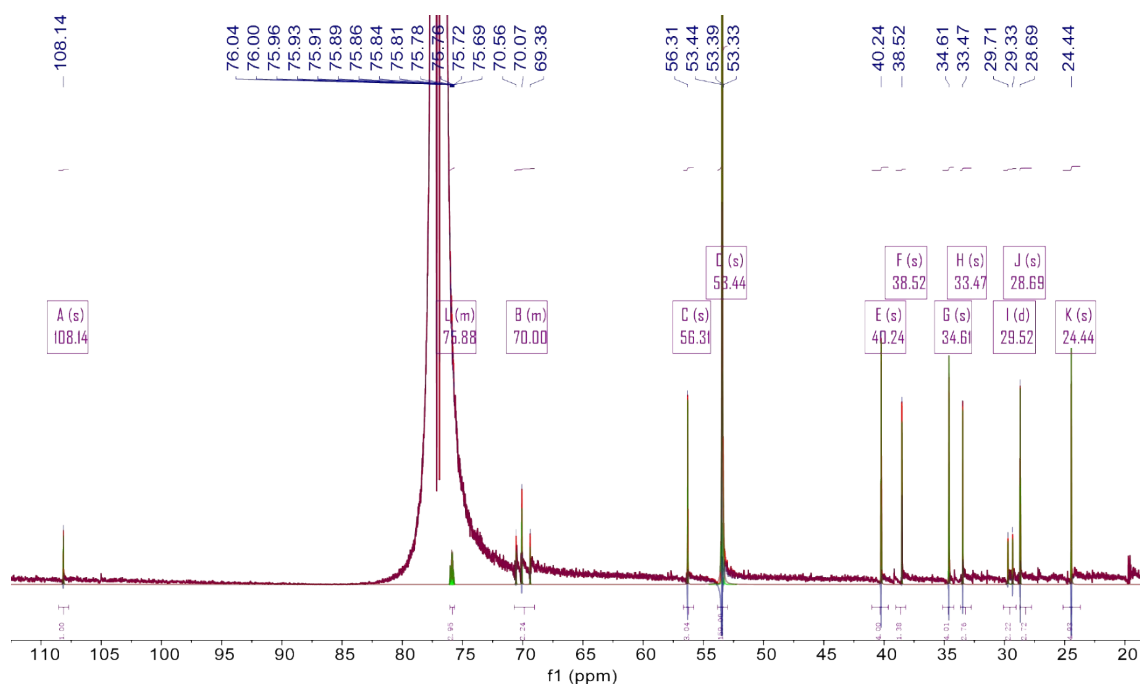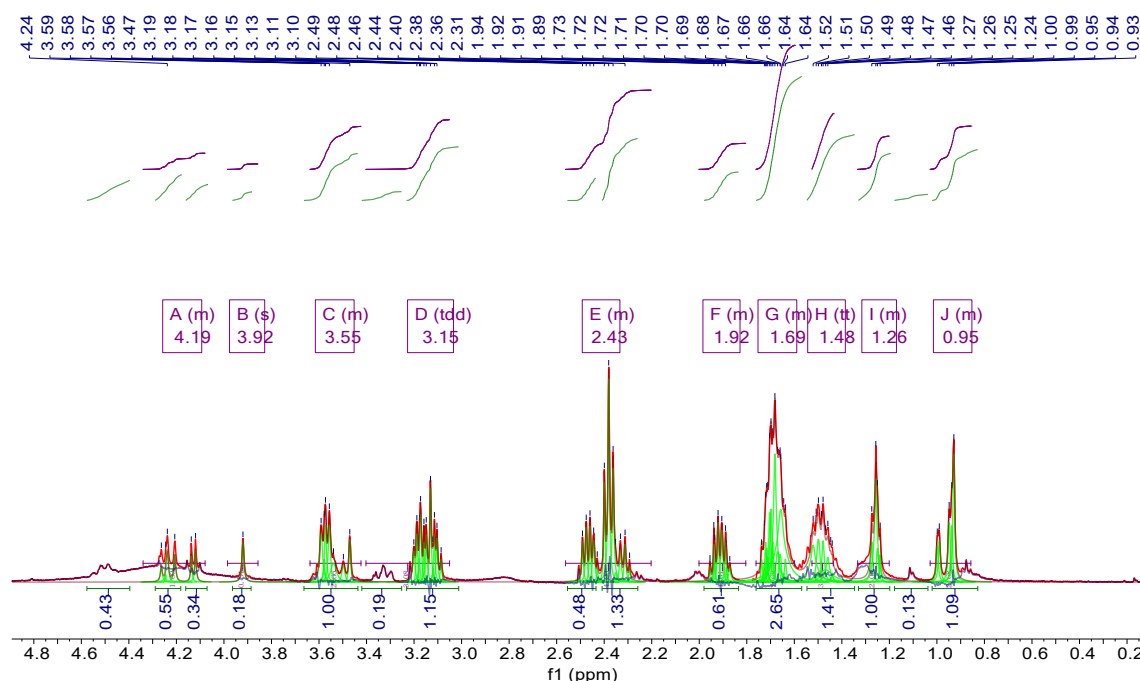



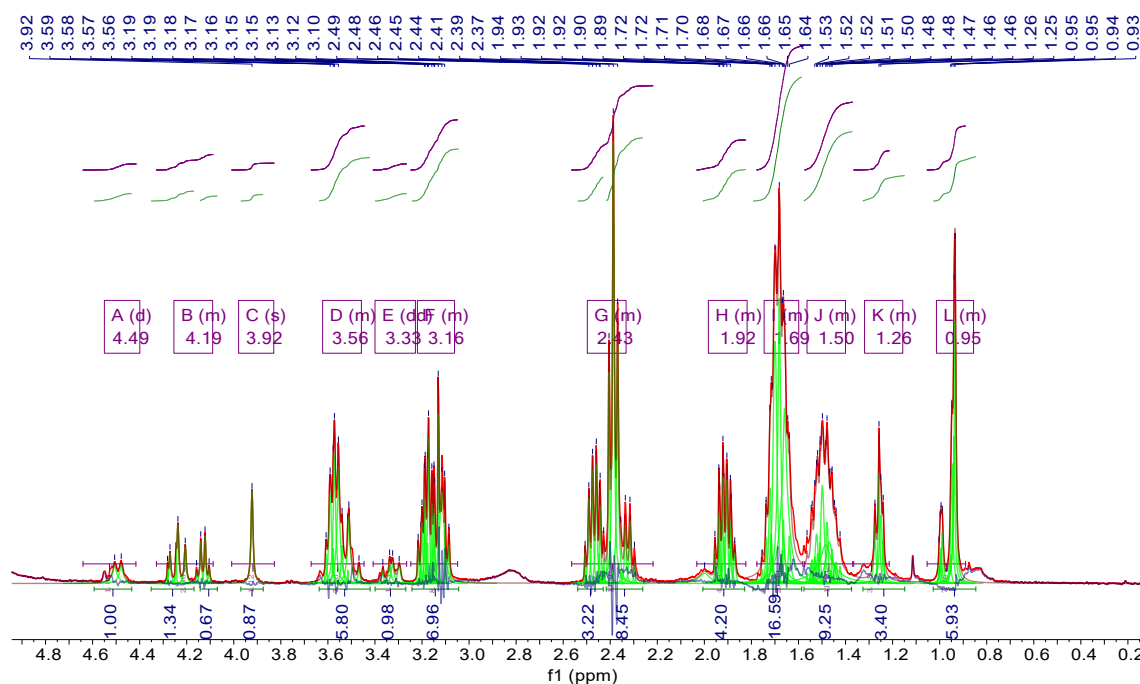

**Figure S20.**  $^1\text{H}$  NMR spectrum of TA-SPG<sub>10-0.1%</sub> (recycling cycle 3). (400 MHz,  $\text{CDCl}_3$ , 298 K)

$^1\text{H}$  NMR (400 MHz, Chloroform- $d$ )  $\delta$  4.49 (d,  $J$  = 11.3 Hz, 1H), 4.33 – 4.09 (m, 3H), 3.92 (s, 1H), 3.67 – 3.45 (m, 7H), 3.33 (dd,  $J$  = 16.5, 11.3 Hz, 1H), 3.25 – 3.05 (m, 8H), 2.56 – 2.22 (m, 14H), 2.03 – 1.82 (m, 5H), 1.78 – 1.58 (m, 20H), 1.57 – 1.37 (m, 11H), 1.37 – 1.21 (m, 3H), 1.05 – 0.89 (m, 7H).

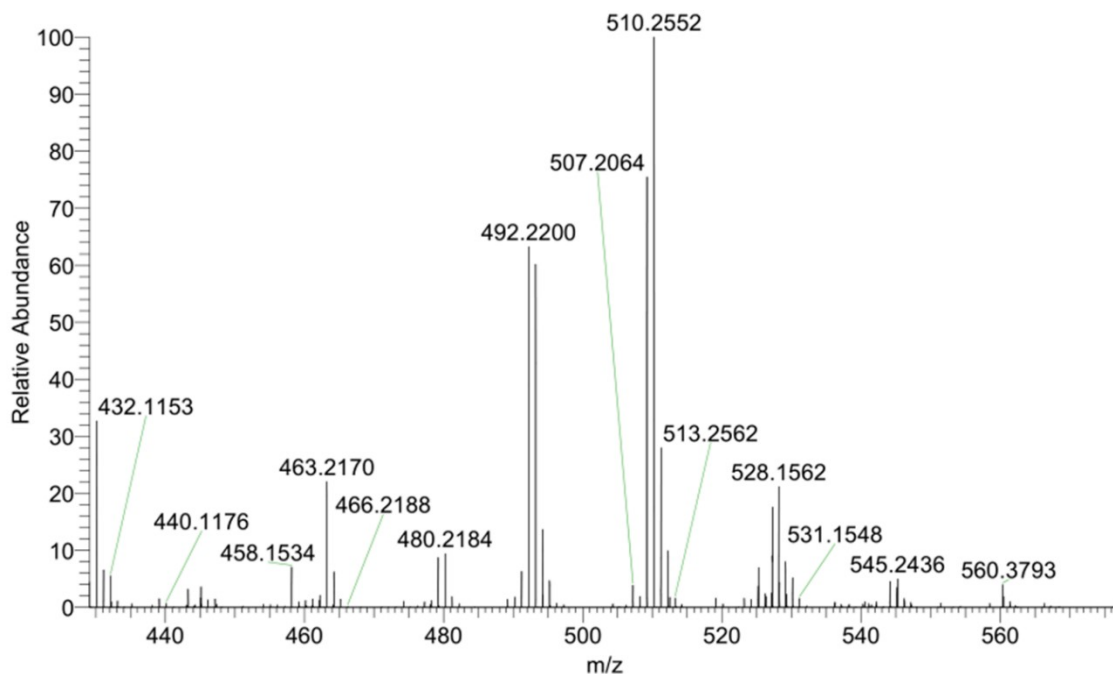

QD-YD-2#49-80 RT: 0.11-0.18 AV: 32

T: FTMS + p NSI Full ms [100.0000-1500.0000]

m/z = 491.67-492.43

| m/z      | Intensity | Relative | Theo. Mass | Delta (ppm) | Composition                                                   |
|----------|-----------|----------|------------|-------------|---------------------------------------------------------------|
| 492.2200 | 583843.1  | 100.00   | 492.2210   | -0.98       | C <sub>23</sub> H <sub>40</sub> O <sub>7</sub> S <sub>2</sub> |

**Figure S21.** Mass spectrum of SPG mono in TA-SPG<sub>10-0.1%</sub> (recycling cycle 1).



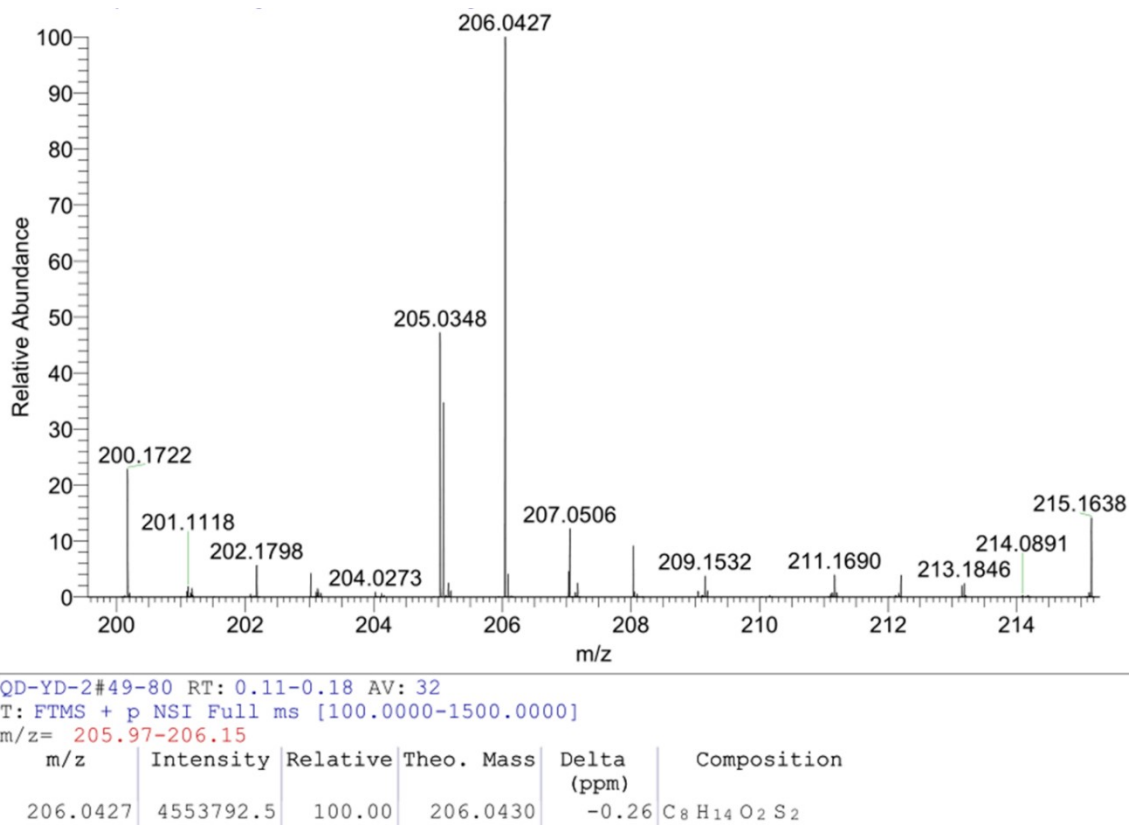

**Figure S22.** Mass spectrum of TA mono in TA-SPG<sub>10-0.1%</sub> (recycling cycle 1).

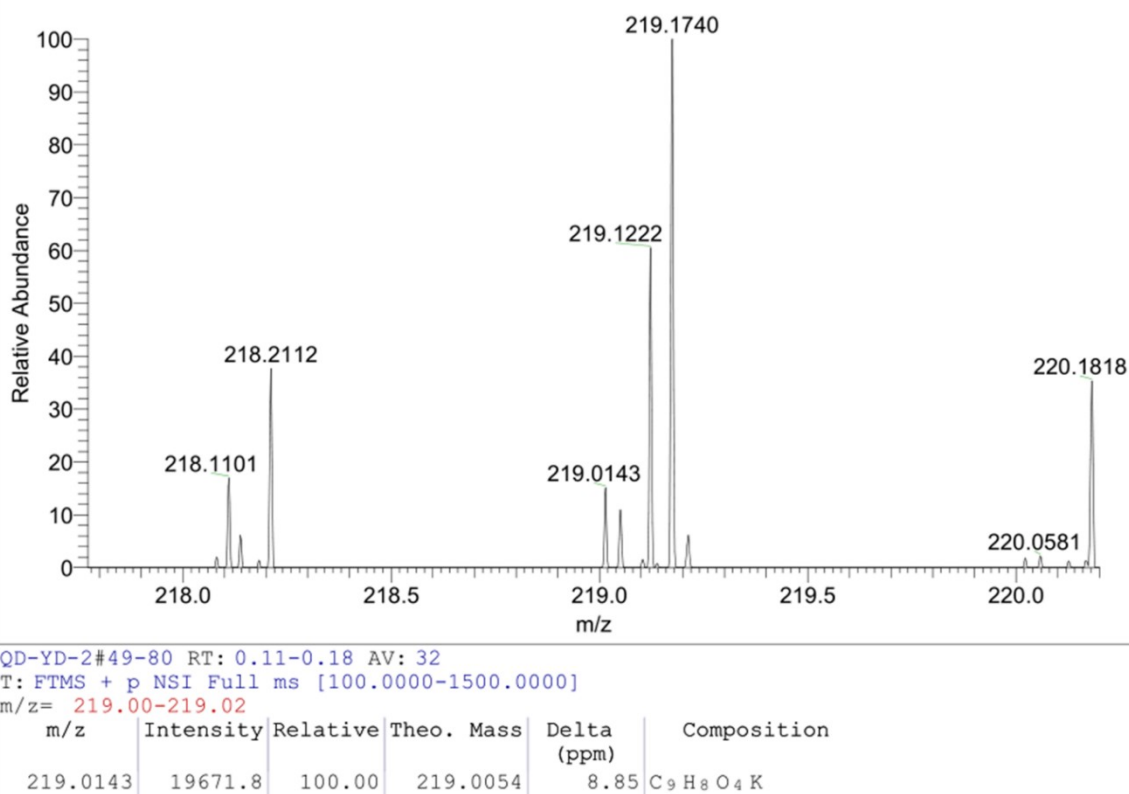

**Figure S23.** Mass spectrum of caffeic acid in TA-SPG<sub>10-0.1%</sub> (recycling cycle 1).

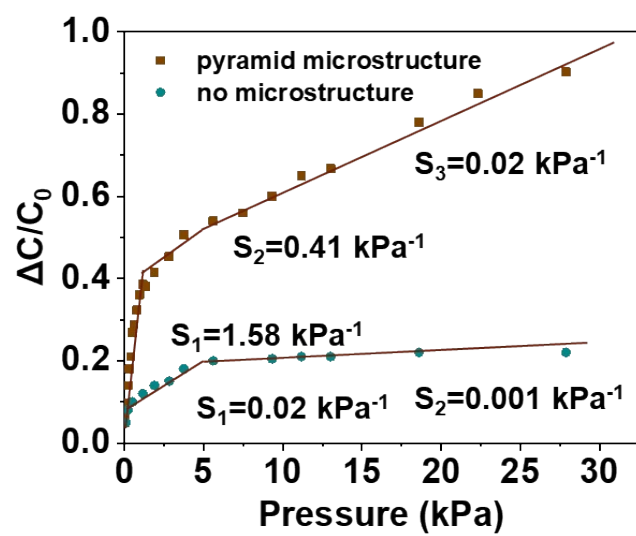

**Figure S24.** The sensor sensitivity comparisons of dielectric layer with and without pyramid microstructure.

### Section III. Supporting Tables

**Table S1.** The summary of the tensile strength and elongation-at-break of all polymer.

| Sample                      | Tensile strength (MPa) | Strain at break (%) | Toughness (MJ/m <sup>3</sup> ) |
|-----------------------------|------------------------|---------------------|--------------------------------|
| TA-SPG <sub>5</sub>         | 1.50                   | 15.98               | 0.1442                         |
| TA-SPG <sub>10</sub>        | 0.05                   | 39.83               | 0.0066                         |
| TA-SPG <sub>10+0.1%CA</sub> | 0.03                   | 151.75              | 0.0250                         |
| TA-SPG <sub>10-5%</sub>     | 0.33                   | 243.87              | 0.4900                         |
| TA-SPG <sub>10-0.1%</sub>   | 1.26                   | 195.52              | 2.1548                         |
| TA-SPG <sub>10-0.5%</sub>   | 0.83                   | 166.53              | 1.0258                         |

**Table S2.** Summarises tensile strength and elongation-at-break with different tensile rates of TA-SPG<sub>10-0.1%</sub>.

| Sample     | Tensile strength (MPa) | Strain at break (%) | Toughness (MJ/m <sup>3</sup> ) |
|------------|------------------------|---------------------|--------------------------------|
| 10 mm/min  | 1.05                   | 254.40              | 2.3584                         |
| 20 mm/min  | 1.26                   | 195.52              | 2.1548                         |
| 50 mm/min  | 1.39                   | 154.97              | 2.0988                         |
| 100 mm/min | 1.57                   | 123.17              | 1.8436                         |

**Table S3.** Self-healing mechanical properties of TA-SPG polymers.

| Time (h) | Tensile strength (MPa) | Strain at break (%) | Toughness (MJ/m <sup>3</sup> ) |
|----------|------------------------|---------------------|--------------------------------|
| 2        | 0.95                   | 17.98               | 0.1101                         |
| 4        | 0.91                   | 47.28               | 0.3527                         |
| 8        | 0.79                   | 98.07               | 0.8499                         |
| 10       | 1.06                   | 144.22              | 1.3967                         |
| 12       | 0.99                   | 193.41              | 1.9394                         |
| virgin   | 1.21                   | 196.18              | 2.1548                         |

**Table S4.** Self-healing mechanical properties of TA-SPG<sub>10-0.1%</sub> polymers under different ambient humidity conditions.

| Sample | Tensile strength (MPa) | Strain at break (%) | Toughness (MJ/m <sup>3</sup> ) |
|--------|------------------------|---------------------|--------------------------------|
| virgin | 1.26                   | 195.52              | 2.1548                         |
| 0%     | 1.08                   | 192.74              | 1.9070                         |
| 50%    | 1.11                   | 189.74              | 1.9394                         |
| 70%    | 1.21                   | 199.82              | 2.0281                         |

**Table S5.** Multiple recycling cycles mechanical properties of TA-SPG<sub>10-0.1%</sub> polymers.

| Sample            | Tensile strength (MPa) | Strain at break (%) | Toughness (MJ/m <sup>3</sup> ) |
|-------------------|------------------------|---------------------|--------------------------------|
| virgin            | 1.26                   | 195.52              | 2.1548                         |
| recycling cycle 1 | 1.13                   | 187.89              | 2.0583                         |
| recycling cycle 2 | 1.12                   | 196.04              | 1.9633                         |
| recycling cycle 3 | 1.12                   | 185.39              | 1.7468                         |

**Table S6.** Swelling ability in different solvents of TA-SPG<sub>10-0.1%</sub>.

| Solvent                  | 1 hour <sup>a</sup> | 1 day <sup>a</sup> | 1 week <sup>a</sup> | 1 month <sup>a</sup> |
|--------------------------|---------------------|--------------------|---------------------|----------------------|
| Distilled water          | 0.0                 | 1.6                | 5.4                 | 9.1                  |
| Petroleum ether          | 0.1                 | 3.4                | 1.0                 | 8.8                  |
| Ethyl acetate            | 10.8                | 10.8               | 0.6                 | 0.6                  |
| Dichloromethane          | 136.5               | 139.9              | 118.1               | 112.1                |
| Acetone                  | 31.7                | ◆                  | ◆                   | ●                    |
| Tetrahydrofuran          | ◆                   | ◆                  | ◆                   | ◆                    |
| Ethanol                  | ◆                   | ◆                  | ◆                   | ●                    |
| Ethyl ether              | 2.2                 | 16.3               | 20.0                | 1.9                  |
| Aqueous HCl <sup>b</sup> | 10.6                | 5.7                | 8.4                 | 6.4                  |
| Triethylamine            | 2.6                 | 1.1                | 0.4                 | 0.0                  |

● represents insoluble polymer chips

◆ represents insoluble polymeric powder

<sup>a</sup> Data for all samples was collected after being completely immersed in the chosen solvents for different time at ambient temperature

<sup>b</sup> The acid concentration was 0.05M

**Table S7.** GPC data including Mn, Mw, and PDI of recycled TA-SPG<sub>10-0.1%</sub>.

|                   | Mn  | Mw   | PDI   |
|-------------------|-----|------|-------|
| Recycled SPG mono | 904 | 1047 | 1.158 |

**Table S8.** Signs of the main cross-peaks in 2DCOS.

Signs read in synchronous and asynchronous spectra, presented as multiplicity

|      |      |      |      |
|------|------|------|------|
| 1645 | +    | -    |      |
| 1711 | -    |      |      |
| 1733 |      |      |      |
|      | 1733 | 1711 | 1645 |

Signs read in synchronous and asynchronous spectra, presented as multiplicity

|      |      |      |
|------|------|------|
| 3200 | -    |      |
| 3500 |      |      |
|      | 3500 | 3200 |
